# Supplementary figures and images for: Functional characterization of BRCA1 gene variants by mini-gene splicing assay
Source: PubMed Central journal article supplement — Eur J Hum Genet. 2014 Mar 26;22(12):1362–8. doi: 10.1038/ejhg.2014.40 (PMC4231409; doi:10.1038/ejhg.2014.40), 2014-03-26

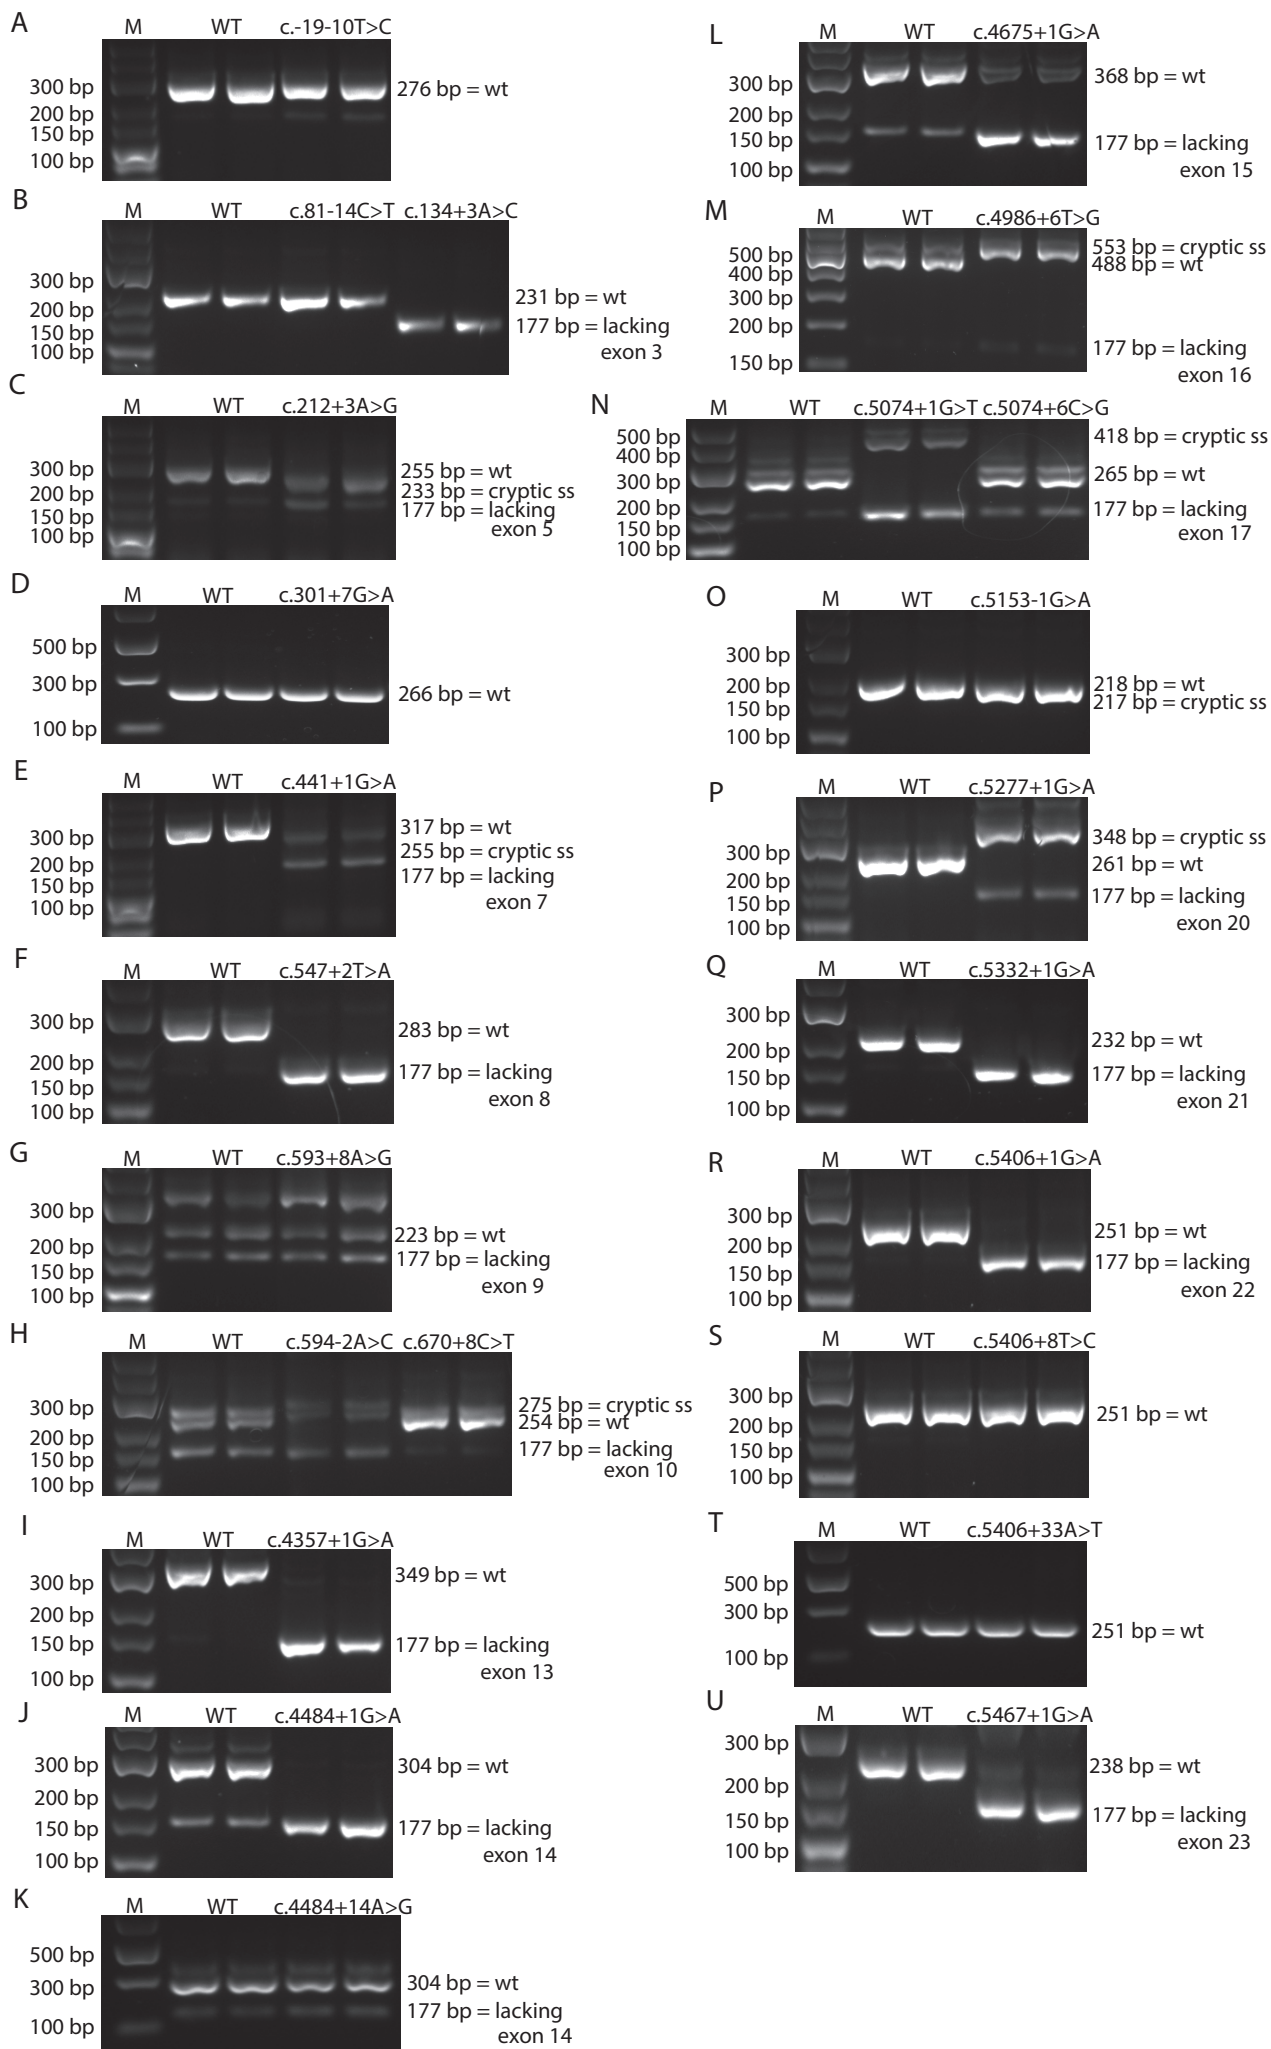

Supplement: ejhg201440x1.pdf [file ejhg201440x1.pdf]
